# Supplementary material
Source: PubMed Central journal article supplement (PMC8386818)
Supplement: NIHMS1716010-supplement-Supp_F1.pdf [file NIHMS1716010-supplement-Supp_F1.pdf]

**Participant A.** Both CREA and ProcessingPAL have almost perfect agreement with sleep diaries

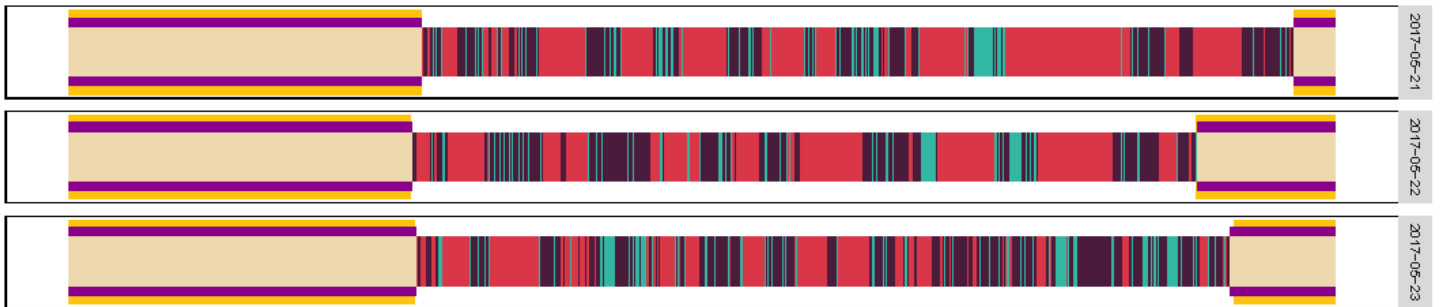

**Participant B.** ProcessingPAL has better agreement with sleep diaries than CREA

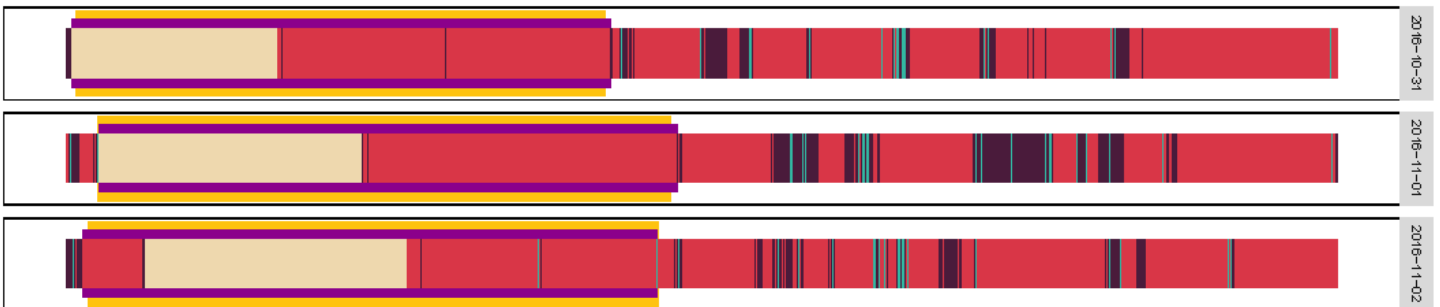

**Participant C.** Both CREA and ProcessingPAL have poor agreement with sleep diaries – participant is very sedentary

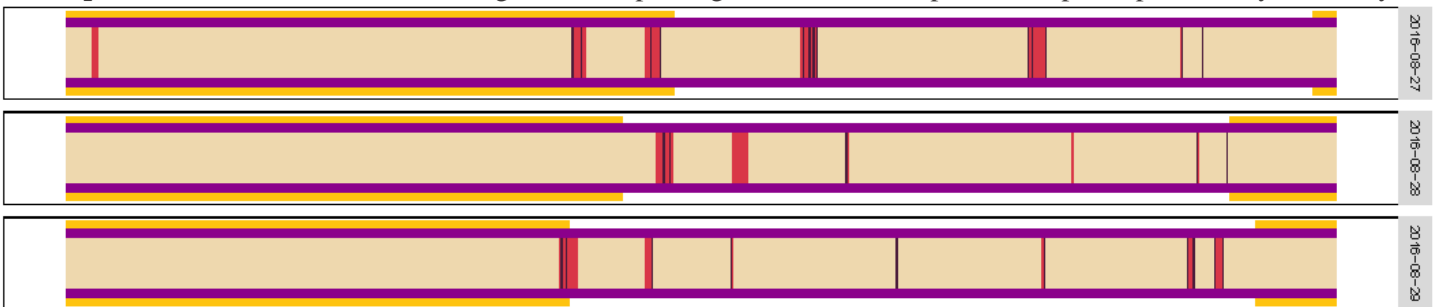

**Participant D.** ProcessingPAL has more variability within participant days than CREA – participant is a restless sleeper

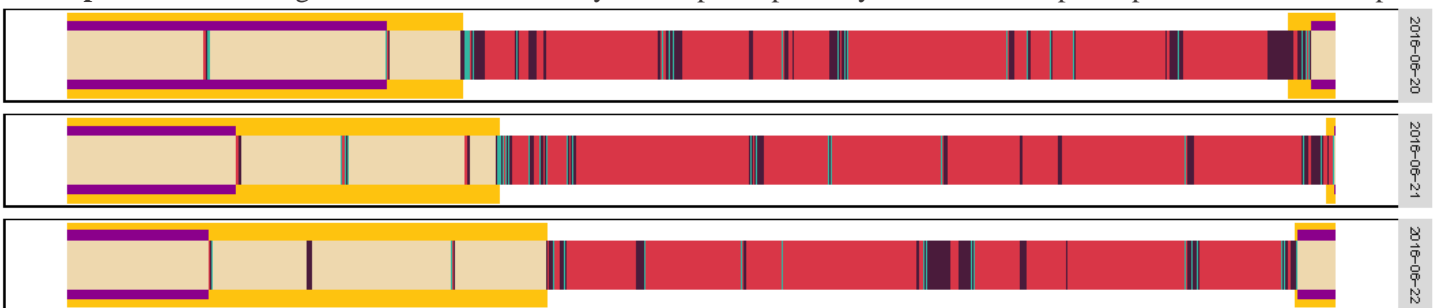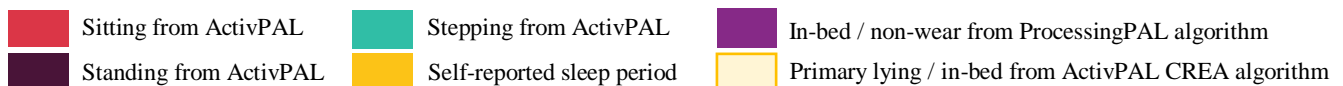

**Supplementary Figure 1.** Sample heat maps of participant's postures from ActivPAL with overlaid self-reported in-bed periods and predicted in-bed / non-wear periods. Each panel represents data from one participant; each rectangle is one 24-hour day. The horizontal outer bars represent sleep diaries (yellow bar), ProcessingPAL in-bed / invalid time (purple bars). The horizontal inner bars represent ActivPAL posture data from CREA; sitting posture is defined as sitting or travelling or secondary lying (red), standing (dark blue), stepping is defined as stepping or cycling (aquamarine) and primary lying (light yellow).
