# Supplementary material
Source: PubMed Central journal article supplement (PMC8386818)
Supplement: NIHMS1716010-supplement-Supp_T1.pdf [file NIHMS1716010-supplement-Supp_T1.pdf]

Supplementary Table 1. Second-level agreement between ProcessingPAL and CREA for non-wear and in bed classification (Study 1)

|                                           | CREA              |                   |          |
|-------------------------------------------|-------------------|-------------------|----------|
|                                           | Out of bed        | In bed            | Non-wear |
| All participants (N = 12,819,661 seconds) |                   |                   |          |
| ProcessingPAL <sup>a</sup>                |                   |                   |          |
| Out of bed                                | 7,397,443 (90.5%) | 384,516 (8.3%)    |          |
| In bed/non-wear                           | 777,042 (9.5%)    | 4,260,660 (91.7%) |          |
| F1 score                                  | 92.7%             | 88.0%             |          |
| Adults (N = 6,044,980 seconds)            |                   |                   |          |
| ProcessingPAL <sup>a</sup>                |                   |                   |          |
| Out of bed                                | 3,608,272 (90.4%) | 173,711 (8.5%)    |          |
| In bed/non-wear                           | 384,056 (9.6%)    | 1,878,941 (91.5%) |          |
| F1 score                                  | 92.8%             | 87.1%             |          |
| Children (N = 6,774,681 seconds)          |                   |                   |          |
| ProcessingPAL <sup>a</sup>                |                   |                   |          |
| Out of bed                                | 3,789,171 (90.6%) | 210,805 (8.1%)    |          |
| In bed/non-wear                           | 392,986 (9.4%)    | 2,381,719 (91.9%) |          |
| F1 score                                  | 92.6%             | 88.8%             |          |

<sup>a</sup>Processing PAL groups in bed and non-wear time together
