# Supplementary material
Source: PubMed Central journal article supplement (PMC8386818)
Supplement: NIHMS1716010-supplement-Supp_T2.pdf [file NIHMS1716010-supplement-Supp_T2.pdf]

Supplementary Table 2. Participant-level summaries of second-level agreement for ProcessingPAL vs. CREA for classifying out-of-bed wear time (Study 2; N = 744 participants)

|                                | Mean (SD) across participants |
|--------------------------------|-------------------------------|
|                                | ProcessingPAL vs. CREA        |
| Binary classification measures |                               |
| Accuracy                       | 0.94 (0.06)                   |
| Sensitivity                    | 0.97 (0.08)                   |
| Specificity                    | 0.90 (0.13)                   |
| F1 score                       | 0.96 (0.07)                   |
| Kappa                          | 0.87 (0.15)                   |

Second-level agreement was calculated for each participant and then summary statistics (mean, SD, and Kappa) were computed across participants  
SD = standard deviation
